# Supplementary material for: Structure–biological activity relationships in a zinc(ii) pyrazole halide complex [ZnCl2(η1-4BrPz)2] via noncovalent interactions, molecular docking, and antimicrobial studies
Source: Royal Society of Chemistry journal article supplement (doi:10.1039/d6ra01123c), 2026-06-04
Supplement: d6ra01123c1.pdf [file d6ra01123c1.pdf]

## Supplementary data

### Structure–Biological Activity Relationships in a Zinc(II) Pyrazole Halide Complex $[\text{ZnCl}_2(\eta^1\text{-4BrPz})_2]$ via Noncovalent Interactions, Molecular Docking, and Antimicrobial Studies

Houyem Khelifi<sup>a</sup>, Naoufel Ben Hamadi<sup>b</sup>, Noureddine Mhadhbi<sup>a,c\*</sup>, Antonio Sánchez-Coronilla<sup>d</sup>, Khaled Hamden<sup>e</sup>, Ahlem Guesmi<sup>b</sup>, Lotfi Khezami<sup>b</sup>, Hajir Wahbi<sup>f</sup> and Houcine Naili<sup>a\*</sup>

<sup>a</sup>Laboratory Physical-Chemistry of the Solid State, Department of Chemistry, Faculty of Sciences of Sfax, University of Sfax, B.P. 1171, Sfax 3000, Tunisia.

<sup>b</sup>Chemistry Department, College of Science, Imam Mohammad Ibn Saud Islamic University (IMSIU), P.O. Box 5701, Riyadh 11432, Saudi Arabia.

<sup>c</sup>University of Monastir, Preparatory Institute for Engineering Studies of Monastir, 5019 Monastir-Tunisia.

<sup>d</sup>Departamento de Química Física, Facultad de Farmacia, Universidad de Sevilla, E-41012 Sevilla, Spain.

<sup>e</sup>Laboratory of Bioresources: Integrative Biology and Exploiting, Higher Institute of Biotechnology of Monastir, University of Monastir, Tunisia

<sup>f</sup>Department of Chemistry, College of Science, Northern Border University, Arar, Saudi Arabia.

\* Corresponding author e-mail address: noureddine2901@yahoo.fr; houcine\_naili@yahoo.com

**Table.S1.** Experimental conditions and data collection of the  $[\text{ZnCl}_2(\eta^1\text{-4BrPz})_2]$  crystal.

|                                                                                                  |                                                                         |
|--------------------------------------------------------------------------------------------------|-------------------------------------------------------------------------|
| <b>Formula</b>                                                                                   | <b><math>[\text{ZnCl}_2(\text{C}_3\text{H}_3\text{BrN}_2)_2]</math></b> |
| <b>Color/Shape</b>                                                                               | <b>Colorless/Block-shaped</b>                                           |
| <b>Mr (gmol<sup>-1</sup>)</b>                                                                    | <b>430.24</b>                                                           |
| <b>Crystal system</b>                                                                            | <b>Monoclinic</b>                                                       |
| <b>Space group</b>                                                                               | <b><i>P2/c</i></b>                                                      |
| <b>Density</b>                                                                                   | <b>2.439</b>                                                            |
| <b>Crystal size (mm)</b>                                                                         | <b>0.27 × 0.17 × 0.09</b>                                               |
| <b>Temperature (K)</b>                                                                           | <b>100</b>                                                              |
| <b>Diffractometer</b>                                                                            | <b>Xcalibur. Atlas. Gemini ultra</b>                                    |
| <b><i>a, b, c</i> (Å)</b>                                                                        | <b>21.3691 (3), 4.0847 (1), 14.2396 (2)</b>                             |
| <b><i>β</i> (°)</b>                                                                              | <b>109.475 (2)</b>                                                      |
| <b>Unit-cell volume (Å<sup>3</sup>)</b>                                                          | <b>1171.81 (4)</b>                                                      |
| <b><i>Z</i></b>                                                                                  | <b>4</b>                                                                |
| <b>Radiation type</b>                                                                            | <b>Mo <i>Kα</i> (0.71073 Å)</b>                                         |
| <b>Absorption Correction</b>                                                                     | <b>multi-scan</b>                                                       |
| <b><i>θ</i> (°)</b>                                                                              | <b>2.9 ≤ <i>θ</i> ≤ 30.4</b>                                            |
| <b>No. of measured, independent and observed [<i>I</i> &gt; 2σ(<i>I</i>)] reflections</b>        | <b>29781, 3220, 3128</b>                                                |
| <b>Index ranges</b>                                                                              | <b><i>h</i> = -29/28. <i>k</i> = -5/5. <i>l</i> = -19/19</b>            |
| <b>(Δ/σ)<sub>max</sub></b>                                                                       | <b>= 0.002</b>                                                          |
| <b>R[<i>F</i><sup>2</sup> &gt; 2σ(<i>F</i><sup>2</sup>)], wR(<i>F</i><sup>2</sup>), <i>S</i></b> | <b>0.025, 0.063, 1.04</b>                                               |
| <b><i>F</i>(000)</b>                                                                             | <b>816</b>                                                              |
| <b>Δρ<sub>max</sub> / Δρ<sub>min</sub> (e Å<sup>-3</sup>)</b>                                    | <b>1.11/ -1.00</b>                                                      |

**Table S2.** Fractional atomic coordinates and isotropic or equivalent isotropic displacement parameters ( $\text{\AA}^2$ ).

|             | <b>x</b>     | <b>y</b>     | <b>z</b>     | <b><math>U_{\text{iso}}^*/U_{\text{eq}}</math></b> |
|-------------|--------------|--------------|--------------|----------------------------------------------------|
| <b>Br1</b>  | 0.77385 (2)  | 0.48101 (8)  | 0.75810 (3)  | 0.01445 (8)                                        |
| <b>Zn1</b>  | 0.500000     | 0.75326 (12) | 0.750000     | 0.01363 (11)                                       |
| <b>Cl1</b>  | 0.44451 (3)  | 1.02812 (18) | 0.60590 (6)  | 0.01548 (14)                                       |
| <b>N1</b>   | 0.57820 (13) | 0.5630 (7)   | 0.71894 (19) | 0.0128 (5)                                         |
| <b>N2</b>   | 0.57659 (14) | 0.4008 (7)   | 0.63501 (19) | 0.0146 (5)                                         |
| <b>H2</b>   | 0.539851     | 0.340403     | 0.588036     | 0.018*                                             |
| <b>C00I</b> | 0.63783 (18) | 0.3436 (8)   | 0.6323 (3)   | 0.0171 (7)                                         |
| <b>H00I</b> | 0.648989     | 0.230976     | 0.581709     | 0.021*                                             |
| <b>C1</b>   | 0.64238 (16) | 0.6169 (8)   | 0.7693 (2)   | 0.0143 (6)                                         |
| <b>H1</b>   | 0.658983     | 0.730600     | 0.830817     | 0.017*                                             |
| <b>C2</b>   | 0.68130 (12) | 0.4809 (7)   | 0.7177 (3)   | 0.0119 (5)                                         |
| <b>Br2</b>  | 0.73676 (2)  | -0.19273 (7) | 0.49343 (2)  | 0.01462 (8)                                        |
| <b>Zn2</b>  | 1.000000     | 0.31780 (11) | 0.750000     | 0.01026 (10)                                       |
| <b>Cl2</b>  | 1.05138 (3)  | 0.56159 (16) | 0.65174 (6)  | 0.01316 (13)                                       |
| <b>N3</b>   | 0.92389 (13) | 0.1184 (7)   | 0.63981 (18) | 0.0116 (5)                                         |
| <b>N4</b>   | 0.92164 (14) | 0.1348 (7)   | 0.54382 (19) | 0.0129 (5)                                         |
| <b>H4</b>   | 0.954658     | 0.203508     | 0.524997     | 0.016*                                             |
| <b>C3</b>   | 0.86274 (18) | 0.0334 (8)   | 0.4807 (3)   | 0.0157 (7)                                         |
| <b>H3</b>   | 0.849639     | 0.023588     | 0.410102     | 0.019*                                             |
| <b>C4</b>   | 0.82501 (12) | -0.0541 (6)  | 0.5392 (3)   | 0.0112 (5)                                         |
| <b>C5</b>   | 0.86522 (17) | 0.0026 (7)   | 0.6376 (2)   | 0.0109 (6)                                         |
| <b>H5</b>   | 0.852528     | -0.035893    | 0.694547     | 0.013*                                             |

**Table S3.** Atomic displacement parameters ( $\text{\AA}^2$ ).

|             | <b><math>U^{11}</math></b> | <b><math>U^{22}</math></b> | <b><math>U^{33}</math></b> | <b><math>U^{12}</math></b> | <b><math>U^{13}</math></b> | <b><math>U^{23}</math></b> |
|-------------|----------------------------|----------------------------|----------------------------|----------------------------|----------------------------|----------------------------|
| <b>Br1</b>  | 0.00919<br>(13)            | 0.01884<br>(14)            | 0.01605<br>(17)            | 0.00121<br>(10)            | 0.00519<br>(16)            | 0.00237 (11)               |
| <b>Zn1</b>  | 0.0075 (2)                 | 0.0196 (2)                 | 0.0137 (3)                 | 0.000                      | 0.0034 (2)                 | 0.000                      |
| <b>Cl1</b>  | 0.0099 (3)                 | 0.0212 (3)                 | 0.0140 (4)                 | -0.0023 (2)                | 0.0023 (3)                 | 0.0014 (3)                 |
| <b>N1</b>   | 0.0106 (13)                | 0.0165 (12)                | 0.0106 (12)                | 0.0005 (10)                | 0.0024 (10)                | -0.0001 (10)               |
| <b>N2</b>   | 0.0110 (13)                | 0.0220 (13)                | 0.0096 (12)                | -0.0033<br>(11)            | 0.0018 (10)                | -0.0042 (10)               |
| <b>C00I</b> | 0.0173 (17)                | 0.0177 (16)                | 0.0162 (16)                | 0.0000 (12)                | 0.0055 (14)                | -0.0012 (12)               |
| <b>C1</b>   | 0.0118 (15)                | 0.0152 (14)                | 0.0145 (15)                | -0.0016<br>(11)            | 0.0026 (12)                | -0.0014 (11)               |
| <b>C2</b>   | 0.0085 (11)                | 0.0133 (12)                | 0.0143 (15)                | 0.0012 (9)                 | 0.0042 (14)                | 0.0040 (10)                |
| <b>Br2</b>  | 0.00964<br>(13)            | 0.01978<br>(14)            | 0.01305<br>(15)            | -0.00374<br>(9)            | 0.00194<br>(13)            | -0.00064<br>(11)           |
| <b>Zn2</b>  | 0.0079 (2)                 | 0.0158 (2)                 | 0.0072 (2)                 | 0.000                      | 0.00263<br>(19)            | 0.000                      |

|            |             |             |             |              |             |              |
|------------|-------------|-------------|-------------|--------------|-------------|--------------|
| <b>CI2</b> | 0.0117 (3)  | 0.0192 (3)  | 0.0099 (3)  | -0.0031 (2)  | 0.0053 (3)  | 0.0007 (3)   |
| <b>N3</b>  | 0.0124 (14) | 0.0167 (12) | 0.0068 (12) | 0.0003 (10)  | 0.0047 (10) | 0.0016 (9)   |
| <b>N4</b>  | 0.0128 (13) | 0.0192 (13) | 0.0065 (12) | -0.0039 (10) | 0.0030 (10) | -0.0013 (10) |
| <b>C3</b>  | 0.0138 (16) | 0.0212 (16) | 0.0107 (15) | -0.0030 (12) | 0.0022 (13) | -0.0014 (12) |
| <b>C4</b>  | 0.0087 (11) | 0.0135 (13) | 0.0108 (13) | -0.0010 (9)  | 0.0026 (12) | 0.0009 (12)  |
| <b>C5</b>  | 0.0097 (15) | 0.0133 (14) | 0.0097 (14) | 0.0013 (10)  | 0.0031 (12) | 0.0005 (10)  |

**Table S4.** Docking scores and interaction details of the interaction between  $[\text{ZnCl}_2(\eta^1\text{-4BrPz})_2]$  and the target.

| Microorganism                |          | ID         | X;Y;Z coordinates        | Docking affinity (kcal/mole) | Type of Hydrogen Bond | Residue | Distance (Å) |
|------------------------------|----------|------------|--------------------------|------------------------------|-----------------------|---------|--------------|
| <b>Staphylococcus aureus</b> | Gyrase A | P20831     | 10.660; -10.313; 2.388   | -4.3                         | conventional          | ASP114  | 2.44         |
|                              |          |            |                          |                              | conventional          | THR296  | 2.29         |
|                              | Gyrase B | P0A0K8     | -13.098; 2.588; 31.162   | -4.5                         | conventional          | TYR117  | 2.58         |
|                              |          |            |                          |                              | conventional          | TYR117  | 2.49         |
|                              |          |            |                          |                              | carbon                | GLY339  | 3.40         |
| <b>Bacillus cereus</b>       | Gyrase A | A0A1S9UZ55 | -38.525; -10.909; 49.205 | -4.1                         | conventional          | ASP543  | 2.35         |
|                              | Gyrase B | Q9X3Y3     | -30.256; -8.696; 1.954   | -4.7                         | conventional          | GLY378  | 3.08         |
| <b>Enterococcus faecalis</b> | Gyrase A | A0A1J6YID4 | 15.342; 7.464; -25.976   | -3.9                         | conventional          | GLU55   | 2.28         |
|                              |          |            |                          |                              | conventional          | ILE139  | 2.98         |
|                              |          |            |                          |                              | conventional          | ASN140  | 2.41         |
|                              | Gyrase B | Q839Z1     | 33.127; 8.561; 2.489     | -4.9                         | $\pi$ -donor          | GLN85   | 2.74         |
| <b>Micrococcus luteus</b>    | Gyrase   | C5C7X9     | 9.348;                   | -3.6                         | carbon                | MET73   | 3.79         |

|                               |           |            |                           |      |              |        |      |
|-------------------------------|-----------|------------|---------------------------|------|--------------|--------|------|
|                               | e A       |            | 2.288; -62.229            |      |              | 2      |      |
|                               | Gyras e B | C5C7X8     | 17.617; 26.649; -1.145    | -4.4 | carbon       | GLU89  | 3.26 |
| carbon                        |           |            |                           |      | GLY147       | 3.01   |      |
| carbon                        |           |            |                           |      | GLY116       | 3.66   |      |
| <b>Escherichia coli</b>       |           |            |                           |      |              |        |      |
|                               | Gyras e A | POAES4     | 234.321; 247.599; 254.078 | -3.1 | conventional | ASP137 | 2.62 |
|                               |           |            |                           |      | carbon       | GLU139 | 3.53 |
|                               | Gyras e B | POAES6     | 251.824; 269.940; 202.136 | -5.3 | conventional | ASP49  | 3.00 |
| <b>Pseudomonas aeruginosa</b> |           |            |                           |      |              |        |      |
|                               | Gyras e A | P48372     | 255.147; 187.948; 268.815 | -4.6 | conventional | ALA656 | 2.40 |
|                               |           |            |                           |      | conventional | VAL674 | 2.58 |
|                               | Gyras e B | Q9I7C2     | -1.836; -10.457; -6.097   | -4.6 | conventional | ILE769 | 2.76 |
|                               |           |            |                           |      | conventional | GLU770 | 2.83 |
|                               |           |            |                           |      | carbon       | ARG278 | 3.70 |
| <b>Klebsiella pneumoniae</b>  |           |            |                           |      |              |        |      |
|                               | Gyras e A | A0A9Q6A465 | 235.850; 186.618; 255.497 | -4.1 | carbon       | ASN318 | 3.70 |
|                               | Gyras e B | A0A377VTL4 | 275.164; 263.511; 209.317 | -3.7 |              |        |      |
| <b>Salmonella enterica</b>    |           |            |                           |      |              |        |      |
|                               | Gyras e A | A0A3Y8V8W7 | 233.975; 247.967; 246.628 | -4.2 |              |        |      |
|                               | Gyras e B | A0A3Z4CPQ3 | 177.888; 248.713; 270.155 | -4.5 | Carbon       | HIS99  | 3.22 |
| <b>Salmonella typhi</b>       |           |            |                           |      |              |        |      |
|                               | Gyras e A | A6GVE9     | 200.955; 257.295; 229.286 | -4.1 | conventional | VAL143 | 2.97 |
|                               |           |            |                           |      | carbon       | GLU141 | 3.46 |
|                               | Gyras e B | P0A2I4     | 177.888; 248.713; 270.155 | -4.5 | carbon       | HIS83  | 3.77 |
|                               |           |            |                           |      | carbon       | HIS99  | 3.24 |
| <b>Aspergillus niger</b>      |           | A2QC57     | 8.966; 44.430; 6.100      | -4.7 | conventional | THR60  | 2.82 |
|                               |           |            |                           |      | conventional | THR60  | 1.82 |

|                         |  |        |                        |      |              |       |      |
|-------------------------|--|--------|------------------------|------|--------------|-------|------|
|                         |  |        |                        |      | al           |       |      |
|                         |  |        |                        |      | carbon       | THR58 | 3.59 |
| <b>Candida albicans</b> |  | P30573 | 14.095; -32.011; 4.101 | -4.1 | conventional | GLU16 | 2.60 |
|                         |  |        |                        |      | $\pi$ -donor | SER21 | 2.63 |

**Table S5.** IR and Raman frequencies (cm<sup>-1</sup>) and band assignments for [ZnCl<sub>2</sub>(η<sup>1</sup>-4BrPz)<sub>2</sub>]

| <i>IR</i> | <i>Raman</i> | <i>Assignment</i>             |
|-----------|--------------|-------------------------------|
| 3336      | 3342         | $\nu_s(\text{N-H})$           |
| 3129      | 3161         | $\nu_{as}(\text{C-H})$        |
| -         | 3135         | $\nu_{as}(\text{C-H})$        |
| 1618      | -            | $\nu(\text{C=N})$             |
| 1523      | 1466         | $\nu(\text{C=C})$             |
| 1427      | -            | $\delta(\text{C-H})$          |
| 1388      | -            | $\nu(\text{C-C})$             |
| 1332      | -            | $\nu(\text{C-N})$             |
| 1255      | -            | $\nu(\text{C-Br})$            |
| 1194      | 1192         | $\nu(\text{C-Cl})$            |
| 1125      | 1125         | $\nu(\text{Zn-N})$            |
| 1048      | -            | $\nu(\text{Zn-Cl})$           |
| -         | 1004         | $\nu_s(\text{Ring})$          |
| -         | 958          | $\beta(\text{Ring})$          |
| 950       | -            | $\gamma(\text{C-H})$          |
| 875       | -            | $\nu_{as}(\text{Zn-Cl})$      |
| 856       | -            | $\nu_{as}(\text{Zn-Cl})$      |
| 846       | -            | $\nu_{as}(\text{Zn-Cl})$      |
| 829       | -            | $\nu(\text{Zn-Br})$           |
| 660       | -            | $\beta(\text{Framework})$     |
| 573       | -            | $\beta(\text{Zn-Br, Ligand})$ |
| 424       | -            | $\nu(\text{Metal-Ligand})$    |
| -         | 258          | $\tau(\text{Framework})$      |
| -         | 155          | $\tau(\text{Framework})$      |
| -         | 131          | $\tau(\text{Framework})$      |
| -         | 81           | $\nu_s(\text{N-H})$           |

$\nu_s$  : symmetric stretching,  $\nu_{as}$  : asymmetric stretching,  $\beta$ : in plane bending,  $\delta$  : scissoring,  $\mathcal{T}$  : twisting,  $\rho$  : rocking.

**Table S6.** Antibacterial activity of  $[\text{ZnCl}_2(\eta^1\text{-4BrPz})_2]$  and tetracycline against eight bacterial strains.

|                               | Compound concentration ( $\mu\text{g/mL}$ ) | Zone of inhibition (mm) | Tetracyclin (1 $\mu\text{g/mL}$ ) |
|-------------------------------|---------------------------------------------|-------------------------|-----------------------------------|
| <i>Enterococcus faecalis</i>  | 0.5                                         | 7.2                     | 19.8                              |
|                               | 1                                           | 12.9                    |                                   |
|                               | 2                                           | 17.8                    |                                   |
| <i>Escherichia coli</i>       | 0.5                                         | 11.4                    | 21.4                              |
|                               | 1                                           | 19.4                    |                                   |
|                               | 2                                           | 24.3                    |                                   |
| <i>Bacillus cereus</i>        | 0.5                                         | 9.4                     | 22.8                              |
|                               | 1                                           | 17.8                    |                                   |
|                               | 2                                           | 24.6                    |                                   |
| <i>Pseudomonas aeruginosa</i> | 0.5                                         | 6.3                     | 6.6                               |
|                               | 1                                           | 11.1                    |                                   |
|                               | 2                                           | 17.8                    |                                   |
| <i>Staphylococcus aureus</i>  | 0.5                                         | 4.2                     | 23.2                              |
|                               | 1                                           | 7.8                     |                                   |
|                               | 2                                           | 12.3                    |                                   |
| <i>Salmonella enterica</i>    | 0.5                                         | 4.8                     | 17.8                              |
|                               | 1                                           | 8.6                     |                                   |
|                               | 2                                           | 15.2                    |                                   |
| <i>Salmonella typhi</i>       | 0.5                                         | 3.9                     | 16.8                              |
|                               | 1                                           | 6.4                     |                                   |
|                               | 2                                           | 9.8                     |                                   |
| <i>Micrococcus luteus</i>     | 0.5                                         | 5.4                     | 22.4                              |
|                               | 1                                           | 10.2                    |                                   |
|                               | 2                                           | 17.2                    |                                   |

**Table S7:** Comparative MIC and MBC values of  $[\text{ZnCl}_2(\eta^1\text{-4BrPz})_2]$  and its free ligand (4BrP) against selected bacterial strains.

| <b>Bacterial strain</b>       | <b><math>\text{ZnCl}_2(\eta^1\text{-4BrPz})_2</math></b> |                                              |                          | <b>Ligand (4BrP)</b>                         |                                              |                          |
|-------------------------------|----------------------------------------------------------|----------------------------------------------|--------------------------|----------------------------------------------|----------------------------------------------|--------------------------|
|                               | <b>MIC<br/>(<math>\mu\text{g/mL}</math>)</b>             | <b>MBC<br/>(<math>\mu\text{g/mL}</math>)</b> | <b>MBC/MIC<br/>ratio</b> | <b>MIC<br/>(<math>\mu\text{g/mL}</math>)</b> | <b>MBC<br/>(<math>\mu\text{g/mL}</math>)</b> | <b>MBC/MIC<br/>ratio</b> |
| <i>Enterococcus faecalis</i>  | 0.94                                                     | 1.89                                         | 2.01                     | 3.32                                         | 13.9                                         | 4.18                     |
| <i>Escherichia coli</i>       | 0.45                                                     | 0.87                                         | 1.93                     | 3.19                                         | 12.8                                         | 4.01                     |
| <i>Bacillus cereus</i>        | 0.72                                                     | 1.32                                         | 1.83                     | 4.41                                         | 13.2                                         | 2.99                     |
| <i>Pseudomonas aeruginosa</i> | 1.94                                                     | 3.12                                         | 1.61                     | 7.84                                         | 19.76                                        | 2.52                     |
| <i>Staphylococcus aureus</i>  | 1.55                                                     | 2.19                                         | 1.41                     | 3.89                                         | 16.34                                        | 4.20                     |
| <i>Salmonella enterica</i>    | 1.64                                                     | 2.59                                         | 1.58                     | 3.32                                         | 13.89                                        | 4.18                     |
| <i>Salmonella typhi</i>       | 2.1                                                      | 3.74                                         | 1.78                     | 3.84                                         | 17.44                                        | 4.54                     |
| <i>Micrococcus luteus</i>     | 0.89                                                     | 1.62                                         | 1.82                     | 2.89                                         | 11.70                                        | 4.04                     |
